# Supplementary material for: Water-assisted synthesis of stable and multicolored CsPbX3@SiO2 core–shell nanoparticles as fluorescent probes for biosensing
Source: Royal Society of Chemistry journal article supplement (doi:10.1039/d3dt02593d), 2023-01-01
Supplement: d3dt02593d1.pdf [file d3dt02593d1.pdf]

# Water-assisted synthesis of stable and multicolored CsPbX<sub>3</sub>@SiO<sub>2</sub> core-shell nanoparticles as fluorescent probes for biosensing

*Cynthia Collantes,<sup>a</sup> William Teixeira,<sup>a</sup> † Victoria González Pedro,<sup>\*,a,b</sup> María-José Bañuls,<sup>a,b</sup> †,‡ Pedro Quintero-Campos,<sup>a</sup> Sergi Morais,<sup>a,b,c</sup> and Ángel Maquieira<sup>a,b,c</sup>*

<sup>a</sup> Instituto Interuniversitario de Investigación de Reconocimiento Molecular y Desarrollo Tecnológico (IDM), Universitat Politècnica de València-Universitat de València, Camino de Vera s/n, E46022 València, Spain.

E-mail: [vigonpe@upvnet.upv.es](mailto:vigonpe@upvnet.upv.es)

<sup>b</sup> Departamento de Química, Universitat Politècnica de València, Camino de Vera s/n, E46022 València, Spain.

<sup>c</sup> Unidad Mixta UPV-La Fe, Nanomedicine and Sensors, IIS La Fe, Valencia, Spain

## SUPPORTING INFORMATION

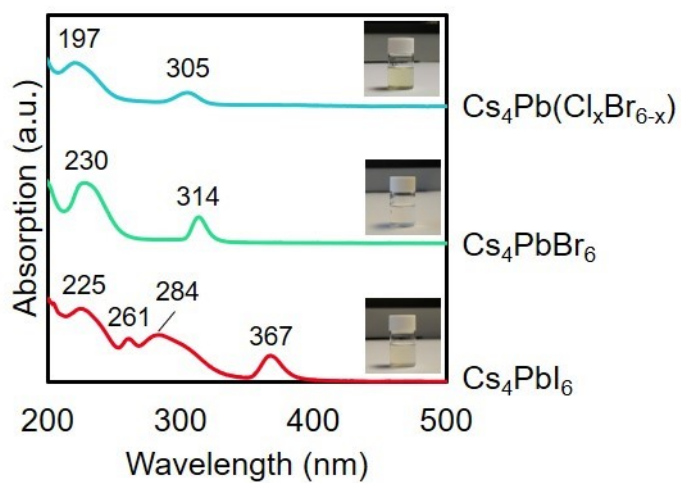

**Figure S1.** UV-Vis absorption spectra of  $\text{Cs}_4\text{PbX}_6$  NCs (X = Cl/Br, Br and I).

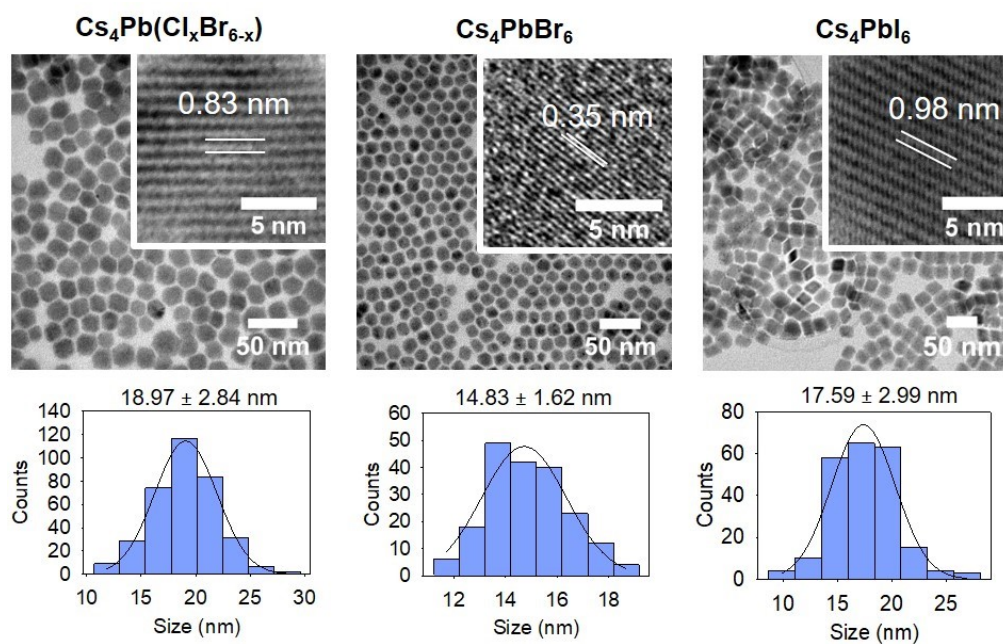

**Figure S2.** TEM images of  $\text{Cs}_4\text{PbX}_6$  NC (X = Cl/Br, Br and I) and histograms of the particle size distribution.

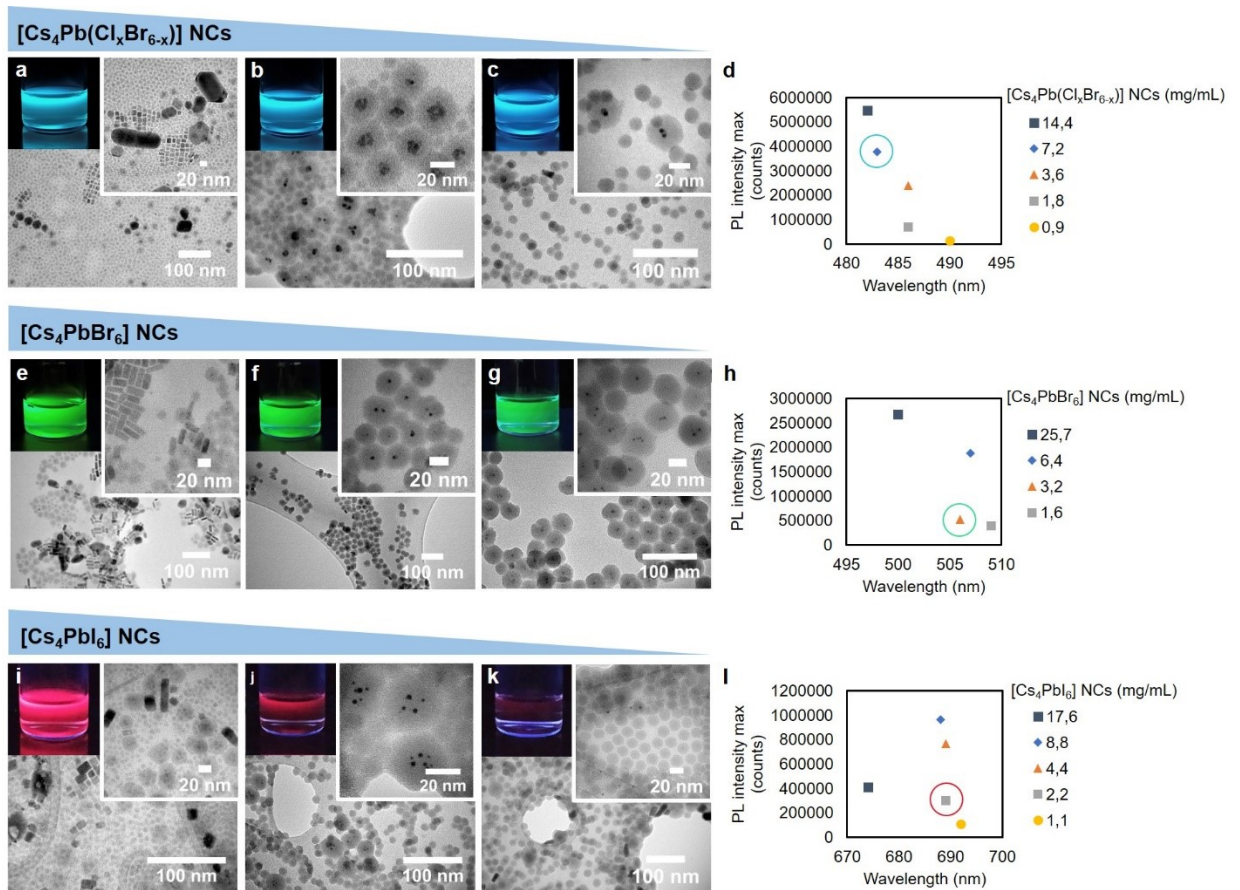

**Figure S3.** Characterization by TEM of the resulting CsPbX<sub>3</sub>@SiO<sub>2</sub> NPs starting from a) 14.4, b) 7.2, c) 3.6 mg/mL Cs<sub>4</sub>Pb(Cl<sub>x</sub>Br<sub>6-x</sub>) NCs e) 6.4, f) 3.2, g) 1.6 mg/mL Cs<sub>4</sub>PbBr<sub>6</sub> NCs, i) 8.8, j) 2.2 k) 1.1 mg/mL Cs<sub>4</sub>PbI<sub>6</sub> NCs. PL intensity at maximum emission for different concentrations of precursor NCs (d, h, and l).

**Table S1.** Description of the resulting CsPbX<sub>3</sub>@SiO<sub>2</sub> samples prepared at different concentrations of Cs<sub>4</sub>PbX<sub>6</sub> NCs

| <b>[Cs<sub>4</sub>Pb(Cl<sub>x</sub>Br<sub>6-x</sub>)]<br/>NCs (mg/mL)<sup>1</sup></b> | <b>Emission<br/>peak (nm)</b> | <b>Fwhm<br/>(nm)</b>          | <b>Particle<br/>size (nm)</b> | <b>Core<br/>size<br/>(nm)</b> | <b>Cores/particle</b>         |                       |
|---------------------------------------------------------------------------------------|-------------------------------|-------------------------------|-------------------------------|-------------------------------|-------------------------------|-----------------------|
| 7.2                                                                                   | 483                           | 26                            | 30                            | 11                            | 1                             |                       |
| 3.6                                                                                   | 486                           | 20                            | 32                            | 3                             | 1                             |                       |
| 1.8                                                                                   | 486                           | 19                            | 32                            | 3                             | 1                             |                       |
| 0.9                                                                                   | 490                           | 19                            | 32                            | -                             | -                             |                       |
| <b>[Cs<sub>4</sub>PbBr<sub>6</sub>]<br/>(mg/mL)<sup>2</sup></b>                       | <b>NCs</b>                    | <b>Emission<br/>peak (nm)</b> | <b>Fwhm<br/>(nm)</b>          | <b>Particle<br/>size (nm)</b> | <b>Core<br/>size<br/>(nm)</b> | <b>Cores/particle</b> |
| 3.2                                                                                   |                               | 506                           | 22                            | 22                            | 4                             | 1                     |
| 1.6                                                                                   |                               | 509                           | 22                            | 25                            | 2                             | 2                     |
| <b>[Cs<sub>4</sub>PbI<sub>6</sub>]<br/>(mg/mL)<sup>3</sup></b>                        | <b>NCs</b>                    | <b>Emission<br/>peak (nm)</b> | <b>Fwhm<br/>(nm)</b>          | <b>Particle<br/>size (nm)</b> | <b>Core<br/>size<br/>(nm)</b> | <b>Cores/particle</b> |
| 2.2                                                                                   |                               | 689                           | 33                            | 33                            | 2                             | 5                     |
| 1.1                                                                                   |                               | 692                           | 38                            | 15                            | -                             | -                     |

<sup>1</sup> The most concentrated sample (14.4 mg/mL) is heterogeneous, containing: cubes 9 nm, hexagonal crystals of 60 nm, spheres of 8 nm with inappreciable core.

<sup>2</sup> The most concentrated sample (25.7 mg/mL) is heterogeneous, containing: cubes 9 nm, hexagonal crystals of 60 nm, spheres of 8 nm with inappreciable core. The next sample (6.4 mg/mL) is also heterogeneous: nanoplates of 23 nm long, spheres of 23 nm with inappreciable core.

<sup>3</sup> The most concentrated sample (17.6 mg/mL) is heterogeneous, containing: spheres of 5 and 26 nm with inappreciable core and irregular particles of 17 nm with dark contrast. The next sample (8.8 mg/mL) is also heterogeneous: cubes of 12 nm, spheres of 5 and 26 nm with inappreciable core. The sample 4.4 mg/mL is still heterogeneous with spheres of 29 nm with 2 cores and spheres of 5 nm with inappreciable core.

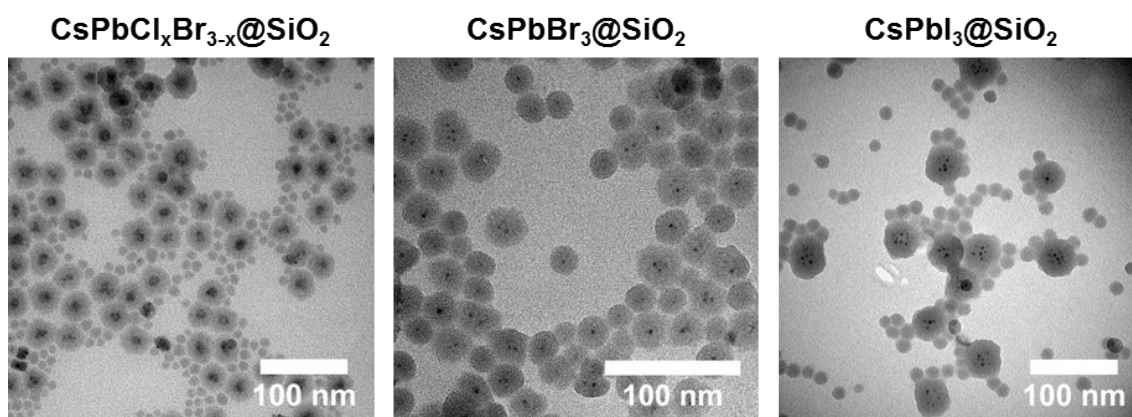

**Figure S4.** TEM images of  $\text{CsPbX}_3\text{@SiO}_2$  NPs where it is appreciated the coexistence of core-shell and empty silica NPs.

**Table S2.** Estimation of the ratio of core-shell to empty  $\text{SiO}_2$  nanoparticles for each composition calculated from three TEM images.

|                                                        | <i>% core-shell</i> | <i>% empty SiO<sub>2</sub></i> | <i>Total particles (counts)</i> |
|--------------------------------------------------------|---------------------|--------------------------------|---------------------------------|
| $\text{CsPb}(\text{Cl}_x\text{Br}_{3-x})\text{@SiO}_2$ | 29,1                | 70,9                           | 693                             |
| $\text{CsPbBr}_3\text{@SiO}_2$                         | 78,2                | 21,8                           | 234                             |
| $\text{CsPbI}_3\text{@SiO}_2$                          | 6,8                 | 93,2                           | 770                             |

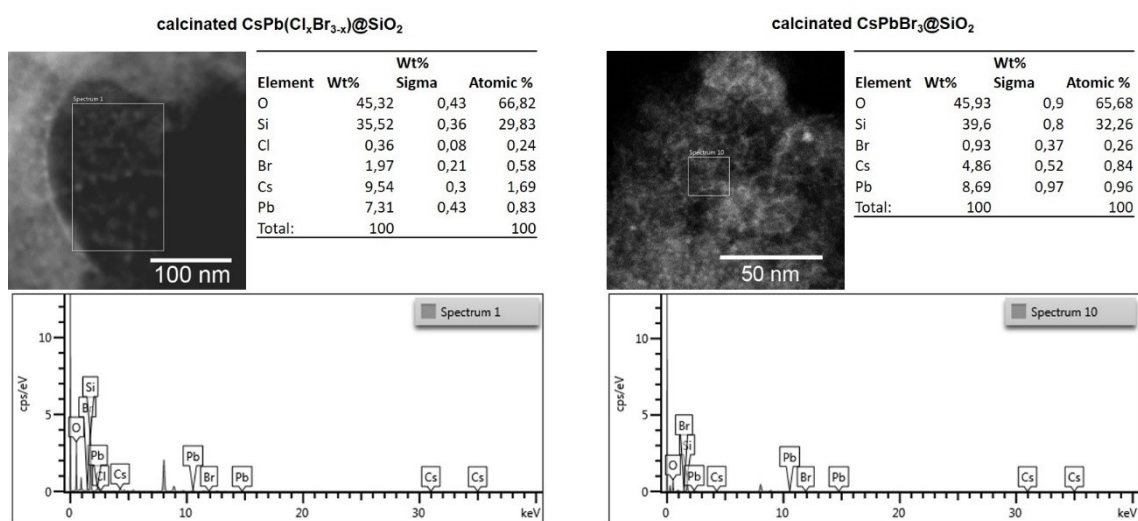

**Figure S4.** Elemental analysis of CsPb(Cl<sub>x</sub>Br<sub>3-x</sub>)@SiO<sub>2</sub> and CsPbBr<sub>3</sub>@SiO<sub>2</sub> showing the atomic distribution of Si, O, Cl, Br, and Pb obtained by EDS TEM.

Table S2. Summary of polar solvent stability of different silica-coated metal halide perovskite core-shell NPs.

| <b>Polar solvent stability</b>                                                               |                             |                                |           |
|----------------------------------------------------------------------------------------------|-----------------------------|--------------------------------|-----------|
| <b>Water-triggered Cs<sub>4</sub>PbBr<sub>6</sub> to CsPbBr<sub>3</sub> phase transition</b> |                             |                                |           |
|                                                                                              | <b>Structural stability</b> | <b>Water or polar solvent</b>  |           |
| <b>CsPb(Cl<sub>x</sub>Br<sub>3-x</sub>)@SiO<sub>2</sub></b>                                  | 4 days (R.H~60%)            | 3 days in water solution*      | This work |
| <b>CsPbBr<sub>3</sub>@SiO<sub>2</sub></b>                                                    | 4 days                      | 4 days in water solution*      |           |
| <b>CsPbI<sub>3</sub>@SiO<sub>2</sub></b>                                                     | Not stable                  |                                |           |
| <b>CsPbBr<sub>3</sub>@SiO<sub>2</sub></b>                                                    | N.R.**                      | 90 days water/ethanol solution | 1         |
| <b>CsPbBr<sub>3</sub>@SiO<sub>2</sub></b>                                                    | N.R.                        | 27 days ethanol                | 2         |
| <b>Ligand-assisted reprecipitation</b>                                                       |                             |                                |           |
| <b>CsPbBr<sub>3</sub>@SiO<sub>2</sub></b>                                                    | 4 weeks (R.H~75%)           | 40 min in water                | 3         |
| <b>Hot injection</b>                                                                         |                             |                                |           |
| <b>CsPbBr<sub>3</sub>@SiO<sub>2</sub></b>                                                    | 30 days (R.H~40%)           | 8 days in hexane/water         | 4         |

\*Thermal-treated NPs.

\*\*Not reported

- 1 M. Li, X. Zhang and P. Yang, *Nanoscale*, 2021, **13**, 3860–3867.
- 2 C. Rossi, R. Scarfiello, R. Brescia, L. Goldoni, G. Caputo, L. Carbone, D. Colombara, L. De Trizio, L. Manna and D. Baranov, *Chem. Mater.*, 2022, **34**, 405–413.
- 3 Q. Zhong, M. Cao, H. Hu, D. Yang, M. Chen, P. Li, L. Wu and Q. Zhang, *ACS Nano*, 2018, **12**, 8579–8587.
- 4 F. Gao, W. Yang, X. Liu, Y. Li, W. Liu, H. Xu and Y. Liu, *Chem. Eng. J.*, 2021, **407**, 128001.
